# Supplementary material for: 突然押し寄せてきた原発避難者 : 福島県三春町の震災対応 (特集 東日本大震災現地活動と支援報告(2))
Source: Royal Society of Chemistry journal article supplement (doi:10.1039/b202298b), 2011-11-01
Supplement: b202298b.doc [file b202298b.doc]

# Supplementary data

Electronic Supplementary Information for *Chem. Commun*.

# Total synthesis of (–)-stevastelin B

### Kazuo Kurosawa, Toshihiko Nagase and Noritaka Chida*

*Department of Applied Chemistry, Faculty of Science and Technology,*

*Keio University, Hiyoshi, Kohoku-ku, Yokohama 223-8522, Japan*

**General Experimental Procedure.** MPs were determined on a Mitamura-riken micro hot stage and are uncorrected. 1H NMR spectra were measured with a 270 MHz or a 300 MHz spectrometer as noted, with tetramethylsilane as the internal standard for solutions in deuteriochloroform at room temp., unless otherwise noted. 13C NMR spectra were taken on a 75 MHz spectrometer. Mass spectra were measured with EI (70 eV) mode or FAB (glycerol matrix) mode. Optical rotations were measured with a JASCO DIP-370 instrument with 1-dm tube and values of []D are recorded in units of 10–1 deg･cm2･g–1. IR spectra were taken with a JASCO FT/IR-200 spectrometer. Organic extracts were dried over Na2SO4 and concentrated below 40 °C under reduced pressure. Solvents were dried over 3Å molecular sieves after distillation. Benzene, toluene, DMF and acetonitrile were distilled from CaH2. MeOH was distilled from CaSO4 (DRIERITE®). Pyridine was distilled from NaOH. Et2O (dehydrated), THF (dehydrated, stabilizer free) and CH2Cl2 (dehydrated) were purchased from Kanto Chemical Co., INC. For column chromatography, Merck silica gel 60 (230-400 mesh) was used, unless otherwise noted. For TLC analysis, Merck precoated TLC plates (silica gel 60 F254 on glass plates, 0.25 mm) were used.

**1D-(1,2,3,4,5/6)-1,2-Anhydro-3,4-*O*-isopropylidene-5-methyl-6-*O*-methyl-cyclohexane-1,2,3,4,6-pentol (3).** A mixture of 1D-(1,2,3,5/4,6)-1,2-*O*-isopropylidene-3-methyl-4-*O*-methyl-cyclohexane-1,2,4,5,6-pentol1 (1.70 g. 7.32 mmol) and Bu2SnO (2.19 g. 14.6 mmol) in MeOH (200 mL) was heated under reflux for 40 h. The reaction mixture was concentrated to give a residue, which was dissolved in 1,4-dioxane (100 mL). To this solution were added *p*-toluenesulfonyl chloride (TsCl, 1.67 g, 14.6 mmol) and 4-dimethylamino pyridine (DMAP, 179 mg, 1.46 mmol), and the mixture was stirred at room temp. for 48 h. After addition of MeOH (10 mL), the reaction mixture was concentrated to give a residue, which was purified by column chromatography (silica gel, 90 g, EtOAc/toluene = 1/3 as eluent) to give 6-*O*-tosyl derivative (2.32 g, 82%) as crystals; mp 120-122 °C (Found: C, 55.7; H, 7.0. C18H26O7S requires C, 55.9; H, 6.8%); []D27 –62 (*c* 1.4, CHCl3); max (neat) 3450, 1355 and 1175 cm-1;H (CDCl3, 270 MHz) 1.21 (3 H, d, *J* = 7.0 Hz), 1.29 and 1.45 (each 3 H, 2s), 1.82 (1 H, ddq, *J* = 4.0, 11.0 and 7.0 Hz), 2.44 (3 H, s), 3.15 (1 H, dd, *J* = 9.2 and 11.0 Hz), 3.51 (1 H, dd, *J* = 9.2 and 9.9 Hz), 3.60 (3 H, s), 3.97 (1 H, dd, *J* = 4.8 and 7.3 Hz), 4.10 (1 H, dd, *J* = 4.0 and 4.8 Hz), 4.66 (1 H, dd, *J* = 7.3 and 9.9 Hz), 7.27-7.34 (2 H, m) and 7.84-7.89 (2 H, m). To a solution of 6-*O*-tosyl derivative (2.32 g, 6.01 mmol) in MeOH (45 mL) at 0 °C was added NaOMe in MeOH (4.92 mol dm-3, 2.50 mL, 12.3 mmol), and the mixture was stirred at room temp. for 16 h. The reaction mixture was neutralized by addition of acetic acid (0.83 mL, 14.4 mmol) at 0 °C, and then concentrated and diluted with EtOAc. The organic layer was washed with saturated aqueous NaHCO3 solution and brine, and dried. Removal of the solvent left a residue, which was purified by column chromatography (silica gel, 65 g, EtOAc/hexanes = 1/5 as eluent) to give **3** (1.20 g, 93%) as crystals; mp 118.0-118.2 °C (Found: C, 61.4; H, 8.8. C11H18O4 requires C, 61.7; H, 8.5%); []D23 –52 (*c* 1.0, CHCl3);H (CDCl3, 270 MHz) 1.20 (3 H, d, *J* = 7.0 Hz), 1.34 and 1.50 (each 3 H, 2s), 1.69 (1 H, ddq, *J* = 2.9, 10.3 and 7.0 Hz), 3.20 (1 H, dd, *J* = 3.7 and 3.8 Hz), 3.27 (1 H, d, *J* = 10.3 Hz), 3.30 (1 H, d, *J* = 3.8 Hz), 3.53 (3 H, s), 4.13 (1 H, dd, *J* = 2.9 and 6.4 Hz) and 4.39 (1 H, dd, *J* = 3.7 and 6.4 Hz); C (CDCl3, 75 MHz) 14.9, 25.3, 25.7, 35.2, 51.4, 57.1, 57.6, 72.2, 75.9, 76.9 and 109.1.

**1L-1,5-Dideoxy-2,3-isopropylidene-1,5-dimethyl-6-*O*-methyl-*allo*-inositol (4), and its *O*-benzoyl derivative (4’).** To a solution of epoxide **3** (1.92 g, 8.96 mmol) in CH2Cl2 (200 mL) under Ar was added Me3Al (0.98 mol dm-3 solution in *n*-hexane, 100 mL, 98 mmol) via a cannula, and the mixture was stirred at room temp. for 16 h. To the reaction mixture was added H2O (10 mL) at 0 °C, and the mixture was diluted with EtOAc. The organic layer was washed successively with aqueous HCl (1 mol dm-3) solution, saturated aqueous NaHCO3 solution and brine, and dried. Removal of the solvent left a syrup, which was purified by column chromatography (silica gel, 60 g, EtOAc/hexanes = 1/6 as eluent) to give alcohol **4** (1.59 g, 77%) as a colorless syrup. A part of this compound was benzoylated and used as an analytical sample. To a solution of compound **4** (99 mg, 0.49 mmol) in pyridine (2 mL) were added benzoyl chloride (0.17 mL, 1.46 mmol) and 4-dimethylaminopyridine (12 mg, 0.098 mmol), and the mixture was stirred at room temp. for 9 h. After addition of MeOH (1 mL) at 0 °C, the reaction mixture was concentrated to give a residue, which was diluted with EtOAc. The organic layer was washed successively with aqueous HCl (1 mol dm-3) solution, saturated aqueous NaHCO3 solution and brine, and dried. Removal of the solvent left a syrup, which was purified by column chromatography (silica gel, 10 g, EtOAc/hexanes = 1/10 as eluent) to give benzoate **4’** (92 mg, 56%) as a colorless syrup (Found: C, 68.0; H, 8.0. C19H26O5 requires C, 68.2; H, 7.8%); []D25 –15 (*c* 1.3, CHCl3); max (neat) 1720 cm-1;H (CDCl3, 270 MHz) 1.01 (3 H, d, *J* = 7.3 Hz), 1.17 (3 H, d, *J* = 7.0 Hz), 1.30 and 1.45 (each 3 H, 2s), 1.87 (1 H, ddq, *J* = 3.7, 7.0 and 7.0 Hz), 2.67 (1 H, ddq, *J* = 7.0, 9.2 and 7.3 Hz), 3.40 (3 H, s), 3.42 (1 H, dd, *J* = 7.0 and 7.0 Hz), 4.31 (1 H, dd, *J* = 3.7 and 7.3 Hz), 4.54 (1 H, dd, *J* = 3.7 and 7.3 Hz), 5.08 (1 H, dd, *J* = 3.7 and 9.2 Hz), 7.42-7.60 (3 H, m) and 8.08-8.12 (2 H, m).

**7-Membered lactone (6).** To a solution of alcohol **4** (616 mg, 2.67 mmol) in CH2Cl2 (30 mL) at 0 °C was added PCC on alumina (1 mmol/g, 14.4 g, 14.4 mmol). After being stirred at room temp. for 4 h, the reaction mixture was diluted with Et2O and the insoluble material was removed by filtration through Celite. The filtrate was concentrated to give crude ketone **5** (610 mg), which was used in the next reaction without further purification. To a solution of crude ketone **5** (610 mg, 2.67 mmol) in (CH2Cl)2 (30 mL) at 0 °C were added mCPBA (692 mg, 4.01 mmol) and KHCO3 (401 mg, 4.01 mmol), and the mixture was stirred at room temp. for 5 h. The reaction mixture was diluted with CHCl3 and washed successively with 20% aqueous NaHSO3 solution, saturated aqueous NaHCO3 solution and brine, and then dried. Removal of the solvent gave a residue, which was purified by column chromatography (silica gel, 15 g, EtOAc/hexanes = 1/7 as eluent) to afford **6** (529 mg, 81% from **4**) as a colorless syrup; []D24 –122 (*c* 1.0, CHCl3); max (neat) 1755 cm-1;H (CDCl3, 300 MHz) 1.29 and 1.33 (each 3 H, 2d, *J* = 6.8 Hz), 1.35 and 1.56 (each 3 H, 2s), 1.94 (1 H, dq, *J* = 8.5 and 6.8 Hz), 3.16 (1 H, dd, *J* = 4.6 and 8.5 Hz), 3.31 (1 H, dq, *J* = 4.6 and 6.8 Hz), 3.51 (3 H, s), 4.23 (1 H, d, *J* = 6.8 Hz) and 5.72 (1 H, d, *J* = 6.8 Hz); C (CDCl3, 75 MHz) 12.6, 18.5, 23.9, 25.3, 37.4, 40.9, 61.6, 79.4, 83.1, 99.3, 108.9 and 172.5; HRMS (EI) Found: M+, 244.1317. C12H20O5 requires *M*, 244.1311.

**Tri-*O*-acetate (7).** To a solution of lactone **6** (1.08 g, 4.42 mmol) in THF (108 mL) at 0 °C was added LiAlH4 (835 mg, 22.1 mmol), and the mixture was stirred at room temp. for 3 h. To the cooled reaction mixture (0 °C) was added H2O (20 mL) dropwise, and the mixture was diluted with MeOH. The insoluble material was removed by filtration through Celite, and the filtrate was concentrated to give a residue, which was dissolved in pyridine (34 mL). To this solution at 0 °C was added Ac2O (17 mL), and the mixture was stirred at room temp. for 12 h. To the mixture was added MeOH (17 mL) at 0 °C, and the mixture was concentrated to give a residue, which was diluted with EtOAc and washed successively with aqueous HCl (1 mol dm-3) solution, saturated aqueous NaHCO3 solution and brine, and then dried. Removal of the solvent left a residue, which was purified by column chromatography (silica gel, 30 g, EtOAc/hexanes = 1/8 as eluent) to afford **7** (1.38g, 98%) as a colorless syrup; []D24 –10 (*c* 1.3, CHCl3); max (neat) 1735-1755 cm-1;H (CDCl3, 300 MHz) 0.91 and 0.92 (each 3 H, 2d, *J* = 7.1 Hz), 1.98-2.06 (2 H, m), 2.07, 2.07 and 2.10 (each 3 H, 3s), 3.10 (1 H, dd, *J* = 2.0 and 9.0 Hz), 3.34 (3 H, s), 4.04 (1 H, dd, *J* = 6.3 and 10.7 Hz), 4.05 (1 H, dd, *J* = 5.6 and 12.5 Hz), 4.21 (1 H, dd, *J* = 3.9 and 10.7 Hz), 4.48 (1 H, dd, *J* = 2.4 and 12.5 Hz) and 5.02 (1 H, ddd, *J* = 2.4, 5.6 and 8.5 Hz); C (CDCl3, 75 MHz) 8.7, 14.1, 20.7, 20.8, 21.0, 35.6, 35.7, 60.7, 63.4, 66.4, 73.2, 81.5, 170.4, 170.6 and 171.0; HRMS (EI) Found: (M+H)+, 319.1745. C15H27O7 requires (*M+H*), 319.1757.

***O*-Mesylate (8).** To a solution of **7** (560 mg, 1.75 mmol) in MeOH (20 mL) at 0 °C was added NaOMe in MeOH (4.92 mol dm-3, 1.78 mL, 8.77 mmol), and the mixture was stirred at room temp. for 12 h. The reaction mixture was neutralized with IR-120 resin (H+ form) and the insoluble material was removed by filtration. The filtrate was concentrated to give crude triol. To a solution of the crude triol in pyridine (11 mL) at 0 °C were added PivCl (0.54 mL, 4.4 mmol) and DMAP (214 mg, 1.75 mmol), and the mixture was stirred at room temp. for 5 h. After addition of MeOH (5 mL) at 0 °C, the reaction mixture was concentrated to give a residue, which was diluted with EtOAc and washed successively with aqueous HCl (1 mol dm-3) solution, saturated aqueous NaHCO3 solution and brine, and then dried. Removal of the solvent left a residue, which was roughly purified by column chromatography (silica gel, 8 g, EtOAc/hexanes = 1/6 as eluent) to afford di-*O*-pivaloyl derivative (418 mg) as a colorless syrup, which was used in the next reaction without further purification. To a solution of the crude di-*O*-pivaloyl (418 mg, 1.16 mmol) in pyridine (10 mL) at 0 °C was added MsCl (0.45 mL, 5.79 mmol), and the mixture was stirred at room temp. for 4 h. The reaction mixture was concentrated to give a residue, which was diluted with EtOAc. The organic layer was washed successively with aqueous HCl (1 mol dm-3) solution, saturated aqueous NaHCO3 solution and brine, and then dried. Removal of the solvent left a residue, which was purified by column chromatography (silica gel, 20 g, EtOAc/hexanes = 1/7 as eluent) to afford **8** (496 mg, 67% from **7**) as a colorless syrup; []D23 –13 (*c* 1.9, CHCl3); max (neat) 1730, 1360 and 1160 cm-1;H (CDCl3, 300 MHz) 0.93 (3 H, d, *J* = 6.8 Hz), 0.96 (3 H, d, *J* = 7.1 Hz), 1.23 and 1.24 (each 9 H, 2s), 2.01 (1 H, m), 2.13 (1 H, ddq, *J* = 1.7, 8.0 and 7.1 Hz), 3.09 (3 H, s), 3.35 (1 H, dd, *J* = 1.7 and 9.0 Hz), 3.48 (3 H, s), 4.08 (1 H, dd, *J* = 5.2 and 10.9 Hz), 4.11 (1 H, dd, *J* = 5.0 and 13.1 Hz), 4.21 (1 H, dd, *J* = 3.5 and 10.9 Hz), 4.69 (1 H, dd, *J* = 2.0 and 13.1 Hz) and 4.91 (1 H, ddd, *J* = 2.0, 5.0 and 8.0 Hz); C (CDCl3, 75 MHz) 8.6, 14.2, 27.1, 27.2, 35.9, 37.1, 38.9, 39.3, 60.8, 63.2, 66.0, 80.9, 82.4, 178.0 and 178.4; MS (FAB) *m*/*z* 439 (M+H).

**Epoxide (9).** To a solution of mesylate **8** (321 mg, 0.732 mmol) in MeOH (17 mL) at 0 °C was added NaOMe in MeOH (4.92 mol dm-3, 0.45 mL, 2.21 mmol), and the mixture was stirred at room temp. for 3 h. To the reaction mixture was added AcOH (0.17 mL) at 0 °C, and the mixture was concentrated to give a residue, which was purified by column chromatography (silica gel, 15 g, EtOAc/hexanes = 1/5 as eluent) to afford **9** (182 mg, 96%) as a colorless syrup; []D24 –21 (*c* 2.0, CHCl3); max (neat) 1730 cm-1;H (CDCl3, 300 MHz) 0.92 (3 H, d, *J* = 6.8 Hz), 1.07 (3 H, d, *J* = 7.1 Hz), 1.23 (9 H, s), 1.44 (1 H, ddq, *J* = 3.4, 7.3 and 6.8 Hz), 2.02 (1 H, m), 2.60 (1 H, dd, *J* = 2.7 and 4.9 Hz), 2.82 (1 H, dd, *J* = 3.9 and 4.9 Hz), 2.95 (1 H, ddd, *J* = 2.7, 3.9 and 7.3 Hz), 3.06 (1 H, dd, *J* = 3.4 and 8.3 Hz), 3.42 (3 H, s), 4.04 (1 H, dd, *J* = 6.1 and 10.7 Hz) and 4.20 (1 H, dd, *J* = 3.7 and 10.7 Hz); C (CDCl3, 75 MHz) 10.7, 14.4, 27.2, 35.6, 38.9, 39.1, 46.8, 55.6, 60.6, 65.9, 84.7 and 178.4; HRMS (EI) Found: (M+H)+, 259.1916. C14H27O4 requires (*M+H*), 259.1909.

**(2*S*,3*S*,4*S*,5*R*)-3-Methoxy-2,4-dimethyloctadecane-1,5-diol (10).** To a stirred mixture of epoxide **9** (532 mg, 2.04 mmol) and CuCN (92 mg, 1.0 mmol) in Et2O at 0 °C under Ar was added a solution of didodecylmagnesium2 [1.0 mol dm-3 solution in Et2O, 10.3 mL, 10.3 mmol; prepared by addition of 1,4-dioxane (1.26 mL, 14.8 mmol) to a solution of 1 mol dm-3 solution of dodecylmagnesium bromide (15 mL), followed by centrifuging], and the mixture was stirred at room temp. for 2 h. The reaction mixture was quenched by addition of saturated aqueous NH4Cl solution at 0 °C, and then diluted with EtOAc. The organic layer was washed with saturated aqueous NaHCO3 solution and brine, and dried. Removal of the solvent left a residue, which was purified by column chromatography (silica gel, 30 g, EtOAc/hexanes = 1/7 as eluent) to afford **10** (668 mg, 87%) as a colorless syrup; []D24 +7.5 (*c* 0.9, CHCl3); max (neat) 3420 cm-1;H (CDCl3, 300 MHz) 0.88 (3 H, t, *J* = 6.8 Hz), 0.94 (3 H, d, *J* = 6.8 Hz), 0.96 (3 H, d, *J* = 6.6 Hz), 1.21-1.34 (22 H, m), 1.45 (2 H, m), 1.71 (1 H, ddq, *J* = 1.7, 4.1 and 6.8 Hz), 1.98 (1 H, m), 3.28 (1 H, dd, *J* = 4.1 and 7.5 Hz), 3.51 (3 H, s), 3.66 (1 H, dd, *J* = 5.6 and 11.0 Hz), 3.71 (1 H, dd, *J* = 4.4 and 11.0 Hz) and 3.73 (1 H, m); C (CDCl3, 75 MHz) 7.2, 14.0, 14.4, 22.6, 26.2, 29.3, 29.6, 29.7, 31.9, 35.0, 37.5, 39.3, 60.4, 65.1, 74.6 and 88.8; MS (FAB) *m*/*z* 345 (M+H).

**(2*S*,3*S*,4*S*,5*R*)-2,4-Dimethyloctadecane-1,3,5-triol (11).** To a solution of methyl ether **10** (788 mg, 2.28 mmol) in CH2Cl2 (40 mL) at –18 °C under Ar was added iodotrimethylsilane3 [prepared by heating a mixture of hexamethyldisilane (2.05 mL, 10 mmol) and iodine (2.5 g, 10 mmol) at 65 °C for 1.5 h]. After being stirred at room temp. for 2 h, to the reaction mixture was added MeOH at 0 °C. The mixture was diluted with EtOAc and washed successively with 20% aqueous Na2S2O3 solution, saturated aqueous NaHCO3 solution and brine, and dried. Removal of the solvent left a residue, which was purified by column chromatography (silica gel, 50 g, EtOAc/hexanes = 1/2 as eluent) to afford **11** (642 mg, 85%) as an amorphous solid; []D22 +17 (*c* 1.3, CHCl3), {lit.,4 []D20 +14.1 (*c* 1.23, CHCl3)}; max (neat) 3250 cm-1;H (CDCl3, 300 MHz) 0.75 (3 H, d, *J* = 6.8 Hz), 0.88 (3 H, t, *J* = 6.8 Hz), 0.92 (3 H, d, *J* = 7.1 Hz), 1.22-1.69 (25 H, m), 1.89 (1 H, m), 2.83 and 3.39 (each 1 H, 2bs), 3.63-3.73 (2 H, m), 3.76 (1 H, dd, *J* = 1.5 and 9.5 Hz), 3.87 (1 H, m) and 4.39 (1 H, bs); C (CDCl3, 75 MHz) 4.0, 13.1, 14.1, 22.6, 26.0, 29.3, 29.6, 29.6, 31.9, 35.4, 37.2, 37.7, 69.1, 77.7 and 83.5; MS (FAB) *m*/*z* 331 (M+H). The 1H NMR data were identical to those reported for the authentic compound derived from natural stevastelin B by degradation.4

**1,3-*O*-Isopropylidene derivative of 2,4-dimethyloctadecane-1,3,5-triol (12).** To a solution of triol **11** (267 mg, 0.808 mmol) in CH2Cl2 (28 mL) at room temp. were added 2-methoxypropene (0.155 mL, 1.62 mmol) and CSA (19 mg, 0.081 mmol), and the mixture was stirred at room temp. for 5 min. To the reaction mixture at 0 °C was added Et3N (4 mL, 28.5 mmol), and the mixture was diluted with EtOAc. The organic layer was washed with saturated aqueous NaHCO3 solution and brine, and dried. Removal of the solvent left a residue, which was purified by column chromatography (silica gel, 30 g, EtOAc/hexanes = 1/14 as eluent) to afford **12** (229 mg, 76%) as colorless syrup; []D21 +35 (*c* 1.2, CHCl3); max (neat) 3540 cm-1; H (CDCl3, 300 MHz) 0.71 (3 H, d, *J* = 6.6 Hz), 0.88 (3 H, t, *J* = 6.7 Hz), 0.93 (3 H, d, *J* = 7.1 Hz), 1.22-1.34 (24 H, m), 1.37 and 1.48 (each 3 H, 2s), 1.68 and 1.92 (each 1 H, 2m), 3.39 (1 H, bs), 3.53 (1 H, dd, *J* =11.3 and 11.4 Hz), 3.70 (1 H, dd, *J* = 5.3 and 11.4 Hz), 3.73 (1 H, dd, *J* = 2.0 and 10.4 Hz) and 3.77 (1 H, m); C (CDCl3, 75 MHz) 4.8, 12.0, 14.1, 19.2, 22.7, 26.2, 29.3, 29.6, 29.7, 30.5, 31.9, 35.0, 36.8, 66.1, 76.7, 81.4 and 98.2; HRMS (EI) Found: M+, 370.3444. C23H46O3 requires *M*, 370.3447.

**Condensation of 12 with Cbz-Ser(Bzl).** To a solution of *N*-benzyloxycarbonyl-*O*-benzyl-L-serine5 [Cbz-Ser(Bzl), 244 mg, 0.742 mmol] in THF (2 mL) under Ar at 0 °C were added 2,4,6-trichlorobenzoylchloride (0.116 mL, 0.742 mmol) and Et3N (0.104 mL, 0.742 mmol). After being stirred at room temp. for 1 h, the reaction mixture was diluted with toluene (7 mL) and centrifuged (3000 rpm, 10 min). The supernatant layer was added to a solution of alcohol **12** (55 mg, 0.148 mmol) in toluene (5.5 mL) at 0 °C under Ar via a cannula. To the mixture under Ar at 0 °C was added a solution of DMAP (14.5 mg, 0.119 mmol) in toluene (2 mL) dropwise over 1.5 h, and the resulting mixture was further stirred at room temp. for 40 min. To the reaction mixture was added aqueous citric acid (1 mol dm-3) solution, and the products were extracted with EtOAc. The organic layer was washed with saturated aqueous NaHCO3 solution and brine, and dried. Removal of the solvent left a residue, which was purified by column chromatography (silica gel, 5 g, EtOAc/hexanes = 1/14 as eluent) to afford an inseparable mixture (ca. 6:1) of **13** and its C-2’ epimer (74 mg, 73%) as a colorless syrup; max (neat) 3300-3500, 1730 and 1705 cm-1; H (CDCl3, 300 MHz, for the major isomer **13**) 0.67 (3 H, d, *J* = 6.6 Hz, 2-Me), 0.88 (3 H, t, *J* = 6.8 Hz, 18-H3), 0.90 (3 H, d, *J* = 6.8 Hz, 4-Me), 1.18-1.60 (24 H, m, 6~17-H2), 1.30 and 1.36 (each 3 H, 2s, CMe2), 1.78-1.87 (2 H, m, 2- and 4-H), 3.48 (1 H, dd, *J* =11.0 and 11.5 Hz, 1-H), 3.57 (1 H, dd, *J* = 1.0 and 10.0 Hz, 3-H), 3.67 (1 H, dd, *J* = 4.9 and 11.5 Hz, 1-H), 3.72 (1 H, dd, *J* = 3.2 and 9.3 Hz, ser-H), 3.92 (1 H, dd, *J* = 2.7 and 9.3 Hz, ser-H), 4.44-4.51 (3 H, m, ser-H and OC*H*2Ph), 5.03 (1 H, m, 5-H), 5.12 (2 H, s, CO2C*H*2Ph), 5.68 (1 H, bd, *J* = 8.5 Hz, NH) and 7.24-7.37 (10 H, m, phenyl); MS (FAB) *m*/*z* 682 (M+H).

***N*-(*tert*-Butoxycarbonyl)-*O*-benzyl-L-threonine benzyl ester [Boc-Thr(Bzl)-OBzl].** To a solution of *N*-(*tert*-butoxycarbonyl)-*O*-benzyl-L-threonine [Boc-Thr(Bzl); purchased from Peptide Institute, Inc., Osaka, Japan] (1.00 g, 3.23 mmol) in DMF (15 mL) at 0 °C were added Et3N (0.45 mL, 3.23 mmol) and benzyl bromide (0.383 mL, 3.23 mmol), and the mixture was stirred at room temp. for 12 h. The reaction mixture was diluted with EtOAc, and washed successively with aqueous citric acid (1 mol dm-3) solution, saturated aqueous NaHCO3 solution and brine, and then dried. Removal of the solvent left a residue, which was purified by column chromatography (silica gel, 20 g, EtOAc/hexanes = 1/8 as eluent) to afford the title compound (1.10 g, 85%) as a colorless syrup; []D23 –18 (*c* 0.7, CHCl3); max (neat) 3450, 1750 and 1710 cm-1; H (CDCl3, 300 MHz) 1.25 (3 H, d, *J* = 6.6 Hz, -Me), 1.44 (9 H, s, Boc), 4.14 (1 H, dq, *J* = 2.2 and 6.6 Hz, -H), 4.34 (1 H, dd, *J* = 2.2 and 9.7 Hz, -H), 4.26 and 4.47 (each 1 H, 2d, *J* = 11.7 Hz, OC*H*2Ph), 5.12 (2 H, s, COOC*H*2Ph), 5.30 (1 H, d, *J* = 9.7 Hz, NH) and 7.15-7.33 (10 H, m, phenyl); C (CDCl3, 75 MHz) 16.1, 28.1, 58.2, 66.9, 70.7, 74.4, 79.6, 127.4, 128.2, 128.32, 128.35, 129.2, 135.2, 137.7, 156.0 and 170.8; MS (FAB) *m*/*z* 400 (M+H).

**Boc-Val-Thr(Bzl)-OBzl.**  Boc-Thr(Bzl)-OBzl (1.10 g, 2.75 mmol) was dissolved in TFA (5 mL) at 0 °C, and the solution was stirred at room temp. for 1 h. The reaction mixture was concentrated to give a residue, which was dissolved in HCl in 1,4-dioxane (6 mol dm-3 solution, 1 mL). The mixture was concentrated and dried in vacuo to afford Thr(Bzl)-OBzl HCl salt (985 mg). To a solution of *N*-(*tert*-butoxycarbonyl)-L-valine (Boc-Val; purchased from Peptide Institute, Inc., Osaka, Japan) (1.50 g, 6.88 mmol) in DMF (10 mL) at –18 °C were added a solution of Thr(Bzl)-OBzl HCl salt (985 mg, 2.75 mmol) in DMF (10 mL), ethyl-3-(3-dimethylaminopropyl)-carbodiimide hydrochloride (WSC•HCl; 1.60 g, 10.3 mmol) and 1-hydroxybenzotriazole (HOBt; 2.79 g, 20.6 mmol), and the mixture was stirred at room temp. for 20 h. The reaction mixture was diluted with EtOAc, and washed successively with aqueous citric acid (1 mol dm-3) solution, saturated aqueous NaHCO3 solution and brine, and then dried. Removal of the solvent left a residue, which was purified by column chromatography (silica gel, 35 g, EtOAc/hexanes = 1/8 as eluent) to afford the title compound (992 mg, 72%) as an amorphous solid; []D22 –9 (*c* 1.6, CHCl3); max (neat) 3310, 1740, 1710 and 1650 cm-1; H (CDCl3, 300 MHz) 0.91 and 0.96 (each 3 H, 2d, *J* = 6.6 Hz, val-Me2), 1.20 (3 H, d, *J* = 6.2 Hz, thr-Me), 1.43 (9 H, s, Boc), 2.10 (1 H, m, val-H), 4.00 (1 H, m, val-H), 4.18 (1 H, dq, *J* = 2.2 and 6.2 Hz, thr-H), 4.28 and 4.50 (each 1 H, 2d, *J* = 11.9 Hz, OC*H*2Ph), 4.69 (1 H, dd, *J* = 2.2 and 9.2 Hz, thr-H), 5.07 (1 H, d, J = 11.9 Hz, COOC*H*Ph), 5.10 (2 H, m, val-NH and COOC*H*Ph),6.45 (1 H, d, *J* = 9.2 Hz, thr-NH) and 7.21-7.37 (10 H, m, phenyl); C (CDCl3, 75 MHz) 16.1, 17.6, 19.1, 28.2, 31.1, 56.6, 59.7, 67.1, 70.7, 74.1, 79.6, 127.6, 127.6, 128.2, 128.3, 128.4, 128.4, 135.1, 137.6, 155.6, 170.0 and 171.6; MS (FAB) *m*/*z* 499 (M+H).

**Boc-Val-Thr (14).** A mixture of Boc-Val-Thr(Bzl)-OBzl(85 mg, 0.17 mmol) and 10% Pd on carbon (32 mg) in EtOH (2 mL) was hydrogenated under atmospheric pressure of H2 at room temp. for 4 h. The insoluble material was removed by filtration and the filtrate was concentrated to give **14** (39 mg, 72%) as an amorphous solid. This compound was used for the next reaction without further purification; []D22 –2.5 (*c* 1.1, MeOH); H (MeOH-*d*4, 300 MHz) 0.94 and 0.98 (each 3 H, 2d, *J* = 6.8 Hz, val-Me2), 1.18 (3 H, d, *J* = 6.3 Hz, thr-Me), 1.45 (9 H, s, Boc), 2.08 (1 H, dqq, J = 3.4, 6.8 and 6.8 Hz, val-H), 3.94 (1 H, bd, *J* = 3.4 Hz, val-H), 4.30 (1 H, dq, *J* = 2.9 and 6.3 Hz, thr-H) and 4.42 (1 H, bd, *J* = 2.9 Hz, thr-H); C (MeOH-*d*4, 75 MHz) 18.6, 19.8, 20.4, 28.7, 31.7, 58.9, 61.7, 68.6, 80.6, 158.0, 173.4 and 174.8; MS (FAB) *m*/*z* 319 (M+H).

**Protected depsipeptide (15).** A mixture of acetonide **13** and its C-2’ epimer (ca. 6:1, 23 mg, 0.034 mmol) in MeOH (4.5 mL) was hydrogenated in the presence of 10% Pd on carbon ethylenediamine complex6 (23 mg) under atmospheric pressure of H2 at room temp. for 1 h. The insoluble material was removed by filtration and the filtrate was concentrated to give crude amine, which was dissolved in DMF (1.9 mL). To this solution at 0 °C were added dipeptide **14** (17 mg, 0.053 mmol), WSC•HCl (32 mg, 0.17 mmol) and HOBt (23 mg, 0.169 mmol), and the whole mixture was stirred at room temp. for 14 h. The reaction mixture was diluted with EtOAc and washed successively with aqueous citric acid (1 mol dm-3) solution, saturated aqueous NaHCO3 solution and brine, and then dried. Removal of the solvent left a residue, which was purified by column chromatography (silica gel, 5 g, acetone/toluene = 1/10 as eluent) to afford **15** (22.9 mg, 80% yield, 55% overall yield from **12**) as a colorless syrup; []D22 +2.3 (*c* 1.2, CHCl3); max (neat) 3290, 1740, 1710 and 1640 cm-1; H (CDCl3, 300 MHz) 0.67 (3 H, d, *J* = 6.6 Hz, 2-Me), 0.88 (3 H, t, J = 6.9 Hz, 18-H3) 0.89 (3 H, d, *J* = 6.6 Hz, 4-Me), 0.89 and 0.93 (each 3 H, 2d, *J* = 6.7 Hz, val-Me2), 1.18 (3 H, d, *J* = 6.6 Hz, thr-Me), 1.21-1.60 (24 H, m, 6~17-H2), 1.33 and 1.37 (each 3 H, 2s, CMe2), 1.44 (9 H, s, Boc), 1.78-1.87 (2 H, m, 2- and 4-H), 2.12 (1 H, m, val-H), 3.29 (1 H, bs, thr-OH), 3.48 (1 H, dd, *J* =11.2 and 11.2 Hz, 1-H), 3.57 (1 H, dd, *J* = 1.7 and 11.2 Hz, 1-H), 3.67 (1 H, dd, *J* = 3.6 and 9.4 Hz, ser-H), 3.68 (1 H, m, 3-H), 3.92 (1 H, dd, *J* = 3.3 and 9.4 Hz, ser-H), 3.96 (1 H, m, val-H), 4.33 (1 H, m, thr-H), 4.45 (1 H, dd, *J* = 2.8 and 7.4 Hz, thr-H), 4.50 (2 H, s, OC*H*2Ph), 4.69 (1 H, ddd, *J* = 3.3, 3.6 and 8.3 Hz, ser-H), 4.98-5.05 (2 H, m, 5-H and val-NH), 6.82 (1 H, bd, *J* = 7.4 Hz, thr-NH), 7.19 (1 H, bd, *J* = 8.3 Hz, ser-NH) and 7.24-7.38 (5 H, m, phenyl); C (CDCl3, 75 MHz) 8.6, 12.2, 14.1, 17.6, 18.0, 18.7, 19.2, 22.7, 24.9, 28.3, 29.3, 29.4, 29.5, 29.59, 29.62, 30.5, 30.8, 31.4, 31.9, 36.8, 52.9, 56.9, 60.0, 66.1, 68.9, 69.5, 73.4, 75.1, 78.8, 80.0, 97.9, 127.0, 127.6, 127.8, 128.4, 129.5, 137.3, 155.8, 169.6, 170.3 and 172.2; MS (FAB) *m*/*z* 849 (M+H).

**Trihydroxy-depsipeptide (16).** A solution of acetonide **15** (55 mg, 0.065 mmol) in acetic acid (3.5 mL) and H2O (1.5 mL) was stirred at room temp. for 10 h. The reaction mixture was diluted with H2O and to this solution was added solid NaHCO3 (6.8 g) at 0 °C. The products were extracted with EtOAc, and the organic layer was washed with saturated aqueous NaHCO3 solution and brine, and then dried. Removal of the solvent left a residue, which was purified by column chromatography (silica gel, 1 g, acetone/toluene = 1/4 as eluent) to afford **16** (50 mg, 94%) as a colorless syrup; []D22 –10 (*c* 0.75, CHCl3); max (neat) 3300, 1740, 1700 and 1630 cm-1; H (CDCl3, 300 MHz) 0.79 (3 H, d, *J* = 7.1 Hz, 2-Me), 0.87 (3 H, t, *J* = 7.1 Hz, 18-H3), 0.90 and 0.92 (each 3 H, 2d, *J* = 6.6 Hz, val-Me2), 0.93 (3 H, d, *J* = 6.6 Hz, 4-Me), 1.16 (3 H, d, *J* = 6.6 Hz, thr-Me), 1.21-1.35 (22 H, m, 7~17-H2), 1.44 (9 H, s, Boc), 1.55 (1 H, m, 6-H), 1.80 (4 H, m, 2, 4, 6-H and OH), 2.13 (1 H, m, val-H), 3.25-3.60 (5 H, m, 1-H2, 3-H and 2OH), 3.69 (1 H, dd, *J* = 3.7 and 9.4 Hz, ser-H), 3.89 (1 H, dd, *J* = 3.9 and 9.4 Hz, ser-H), 3.99 (1 H, dd, *J* = 5.4 and 8.1 Hz, val-H), 4.33 (1 H, m, thr-H), 4.46 (1 H, dd, *J* = 1.7 and 7.6 Hz, thr-H), 4.51 (2 H, s, OC*H*2Ph), 4.65 (1 H, ddd, *J* = 3.7, 3.9 and 7.8 Hz, ser-H), 5.06 (1 H, m, 5-H), 5.13 (1 H, d, *J* = 8.1 Hz, val-NH), 6.99 (1 H, bd, *J* = 7.6 Hz, thr-NH), 7.25-7.37 (5 H, m, phenyl) and 7.48 (1 H, bd, *J* = 7.8 Hz, ser-NH); C (CDCl3, 75 MHz) 7.3, 14.0, 14.1, 17.7, 18.2, 19.3, 22.7, 25.5, 28.3, 29.3, 29.5, 29.6, 29.7, 30.7, 31.9, 32.0, 37.9, 38.3, 53.2, 57.2, 60.1, 66.7, 67.8, 69.3, 73.4, 78.4, 79.6, 80.2, 127.7, 127.9, 128.4, 137.1, 156.0, 169.9, 170.7 and 172.4; MS (FAB) *m*/*z* 809 (M+H).

**Carboxylic acid (17).** To a solution of triol **16** (47 mg, 0.058 mmol) in CH2Cl2 (9 mL) at 0 °C were added TEMPO (1.24 g dm-3 solution in CH2Cl2; 0.073 mL), KBr (5.96 g dm-3 solution in H2O; 0.115 mL), NaOCl (0.35 mol dm-3 solution in H2O; 0.02 mL) and NaHCO3 (50 g dm-3 solution in H2O; 0.02 mL). After being stirred at 0 °C for 1 h, to the reaction mixture was added 20% aqueous Na2S2O3 solution. The products were extracted with CHCl3, and the organic layer was washed with 20% aqueous Na2S2O3 solution and then dried. Removal of the solvent gave crude aldehyde (47 mg), which was dissolved in *t*-BuOH (3.7 mL) and H2O (0.9 mL). To this solution were added NaH2PO4•2H2O (36 mg, 0.23 mmol), HOSO2NH2 (28 mg, 0.29 mmol) and NaClO2 (31 mg, 0.35 mmol), and the mixture was stirred at room temp. for 1 h. To the reaction mixture at 0 °C was added aqueous citric acid (1 mol dm-3) solution, and the products were extracted with CHCl3. The organic layer was washed with aqueous citric acid (1 mol dm-3) solution and dried. Removal of the solvent gave **17** (47 mg, 100% crude yield) as a colorless syrup, which was used in the next reaction without further purification; []D23 –5 (*c* 0.76, CHCl3); max (neat) 3310, 1735, 1715 and 1650 cm-1; H (CDCl3, 300 MHz) 0.87 (3 H, t, *J* = 6.3 Hz, 18-H3), 0.89 (3 H, d, *J* = 6.3 Hz, val-Me), 0.96 (3 H, d, *J* = 7.3 Hz, val-Me), 0.96 (3 H, d, *J* = 7.3 Hz, 4-Me), 1.10-1.35 (28 H, m, thr-Me, 2-Me and 7~17-H2), 1.43 (9 H, s, Boc), 1.57 (2 H, m, 6-H2), 1.91 (1 H, m, 4-H), 2.10 (1 H, m, val-H), 2.68 (1 H, m, 2-H), 3.65 (1 H, m, ser-H), 3.72 (1 H, m, 3-H), 3.88 (1 H, m, ser-H), 4.04 (1 H, dd, *J* = 5.9 and 8.3 Hz, val-H), 4.32 (1 H, m, thr-H), 4.46-4.51 (3 H, m, thr-H and OC*H*2Ph), 4.68 (1 H, m, ser-H), 5.06 (1 H, m, 5-H), 5.24 (1 H,bd, *J* = 8.3 Hz, val-NH),, 7.26-7.35 (6 H, m, thr-NH and phenyl) and 7.42 (1 H, bd, *J* = 8.3 Hz, ser-NH); MS (FAB) *m*/*z* 823 (M+H).

**Macrolactam (19).** To a solution of carboxylic acid **17** (47 mg, 0.058 mmol) in CH2Cl2 (6 mL) under Ar at 0 °C was added trifluoroacetic acid (1.1 mL). After being stirred at 0 °C for 1 h, the reaction mixture was concentrated and dried in vacuo to give **18**, which was dissolved in DMF (58 mL). To this solution under Ar at 0 °C were added diethyl phosphorocyanidate (DEPC, 0.0431 mL, 0.288 mmol) and Et3N (0.0445 mL, 0.317 mmol), and the mixture was stirred at 0 °C for 30 min, and then at room temp. for 16 h. The reaction mixture was diluted with EtOAc and washed successively with aqueous citric acid (1 mol dm-3) solution, saturated aqueous NaHCO3 solution and brine, and dried. Removal of the solvent left a residue, which was purified by column chromatography (silica gel, 1 g, acetone/toluene = 1/6 as eluent) to afford **19** (16.7 mg, 41% from **16**) as a colorless syrup; []D21 –33 (*c* 0.8, CHCl3); max (neat) 3310, 1730 and 1650 cm-1; H (CDCl3, 300 MHz) 0.89 (3 H, t, *J* = 6.8 Hz, 18-H3), 0.98 (3 H, d, *J* = 7.2 Hz, 4-Me),0.99 and 1.04 (each 3 H, 2d, *J* = 6.6 Hz, val-Me2), 1.12 (3 H, d, *J* = 6.6 Hz, thr-Me), 1.18 (3 H, d, *J* = 7.4 Hz, 2-Me), 1.21-1.33 (22 H, m, 7~17-H2), 1.51 and 1.63 (each 1 H, 2m, 6-H2), 1.80 (1 H, m, 4-H), 2.06 (1 H, m, val-H), 2.52 (1 H, m, 2-H), 3.26 and 3.33 (each 1 H, 2bs, OH), 3.57 (1 H, dd, *J* = 4.3 and 8.4 Hz, 3-H), 3.89 (1 H, dd, *J* = 6.3 and 9.9 Hz, ser-H), 4.00 (1 H, dd, *J* = 4.7 and 9.9 Hz, ser-H), 4.12 (1 H, dd, *J* = 7.4 and 9.0 Hz, val-H), 4.35-4.45 (2 H, m, thr-H and ser-H), 4.49 (1 H, m, thr-H), 4.50 and 4.58 (each 1 H, 2d, *J* = 11.1 Hz, OC*H*2Ph), 4.90 (1 H, m, 5-H), 6.80 (1 H, bd, *J* = 7.1 Hz, thr-NH), 7.19 (1 H, bd, *J* = 7.4 Hz, val-NH), 7.24-7.35 (5 H, m, phenyl) and 7.54 (1 H, bd, *J* = 7.7 Hz, ser-NH); C (CDCl3, 75 MHz) 14.1, 15.9, 16.0, 16.0, 16.2, 18.8, 19.2, 19.4, 22.7, 26.1, 29.4, 29.5, 29.6, 29.6, 30.2, 31.3, 31.9, 39.6, 45.8, 53.2, 58.0, 62.0, 65.2, 67.4, 69.2, 73.5, 79.9, 128.0, 128.5, 137.6, 169.6, 170.9, 172.7 and 176.7; HRMS (FAB) *m/z* 704.4873, calcd for C39H66N3O8 (*M+H*) 704.4850.

**Stevastelin B (1).** A mixture of macrocycle **19** (5.1 mg, 0.0073 mmol) and 20% Pd(OH)2 on carbon (6 mg) in MeOH (1 mL) was hydrogenated at room temp. under atmospheric pressure of H2 for 2 h. The insoluble material was removed by filtration and filtrate was concentrated to give **20**, which was dissolved in pyridine (0.9 mL). To this solution at 0 °C was added acetic anhydride (0.010 mL), and the mixture was stirred at 0 °C for 2 h. To the reaction mixture was added MeOH at 0 °C, and the resulting mixture was concentrated to give a residue, which was purified by column chromatography (silica gel, 0.6 g, MeOH/CHCl3 = 1/60 as eluent) to afford **1** (3.2 mg, 67% from **19**) as an amorphous solid; []D21 –51 (*c* 0.25, CHCl3), {natural stevastelin B, []D17 –48 (*c* 0.1, CHCl3) (measured in our laboratory )}; H (300 MHz, DMSO-*d*6) 0.73 (3 H, d, *J* = 7.1 Hz, 4-Me), 0.82 (3 H, d, *J* = 6.1 Hz, val-Me), 0.85 (3 H, t, *J* = 6.3 Hz, 18-H3), 0.88 (3 H, d, *J* = 6.6 Hz, val-Me), 1.00 (3 H, d, *J* = 6.1 Hz, thr-Me), 1.13 (3 H, d, *J* = 7.6 Hz, 2-Me), 1.23 (22 H, m, 7~17-CH2), 1.43 and 1.53 (each 1 H, 2m, 6-H2), 1.72 (1 H, m, 4-H), 1.98 (3 H, s, OAc), 2.10 (1 H, m, val-H), 2.19 (1 H, m, 2-H), 3.61 (1 H, m, 3-H), 3.94 (1 H, dd *J* = 7.1 and 10.7 Hz, ser-H), 3.98 (1 H, dd, *J* = 10.3 and 11.0 Hz, val-H), 4.18 (1 H, m, thr-H), 4.27 (1 H, bd *J* = 9.1 Hz, thr-H), 4.40 (1 H, dd, *J* = 6.6 and 10.7 Hz, ser-H), 4.73 (1 H, ddd *J* = 6.6, 7.1 and 8.1 Hz, ser-H), 4.90 (1 H, d, *J* = 4.4 Hz, thr-OH), 4.92 (1 H, m, 5-H), 5.52 (1 H, d, *J* = 5.1 Hz, 3-OH), 7.81 (1 H, d, *J* =8 .1 Hz, ser-NH), 7.93 (1 H, d, *J* = 10.3 Hz, val-NH) and 8.32 (1 H, d, *J* = 9.1 Hz, thr-NH) ; C (75 MHz, DMSO-*d*6) 6.5 (4-CH3), 13.9 (18-C), 16.4 (2-CH3), 19.0 (val-CH3), 19.4 (val-CH3), 20.5 (thr-CH3), 20.6 (CO*C*H3), 22.1 (17-C), 25.4 (7-C), 28.69, 28.73, 28.9, 28.99, 29.04, 29.8 and 31.3 (8~16-C and val-C), 31.7 (6-C), 40.0 (4-C), 46.3 (2-C), 49.9 (ser-C), 57.7 (thr-C), 61.2 (val-C), 62.4 (ser-C), 66.8 (thr-C), 75.3 (3-C), 78.8 (5-C), 169.4 (ser-CO), 170.1 (O*C*OCH3), 170.4 (thr-CO), 171.3 (val-CO) and 174.9 (1-C); H (300 MHz, CDCl3) 0.88 ( 3 H, t, *J* = 6.6 Hz, 18-H3), 1.03 (3 H, d, *J* = 6.3 Hz, 4-Me), 1.05 (6 H, d, *J* = 6.6 Hz, val-CH3x2), 1.14 (3 H, d, *J* = 6.3 Hz, thr-Me), 1.25 (22 H, m, 7~17-H2), 1.31 (3 H, d, *J* = 7.4 Hz, 2-Me), 1.40-1.78 (2 H, m, 6-H2), 1.84 (1 H, m, 4-H), 2.06 (3 H, s, OAc), 2.13 (1 H, m, val-H), 2.66 (1 H, m, 2-H), 2.97 and 3.39 (each 1 H, 2bs, 2OH), 3.64 (1 H, m, 3-H), 3.97 (1 H, dd, *J* = 6.9 and 6.9 Hz, val-H), 4.21 (1 H, m, ser-H), 4.44 (1 H, m, thr-H) 4.48 (1 H, m, thr-H), 4.49 (1 H, dd, *J* = 5.5 and 11.3 Hz, ser-H), 4.65 (1 H, dd, *J* = 7.2 and 11.3 Hz, ser-H), 4.86 (1 H, m, 5-H), 6.71 (1 H, bs, thr-NH), 7.20 (1 H, bs, val-NH) and 7.51 (1 H, bs, ser-NH); HRMS (FAB) *m/z* 656.4477, calcd for C34H62N3O9 (*M+H*) 656.4486. The 1H and 13C NMR data were fully identical with those of natural stevastelin B.7

## References

1 N. Chida, K. Yamada and S. Ogawa, *J. Chem. Soc., Perkin Trans. 1*, 1993, 1957.

2 B. H. Lipshutz and S. Sengupta, *Org*. *React., 1992*, **41**, 135; N. Chida, N. Sakata, K. Murai, T. Tobe and S. Ogawa, *Bull. Chem. Soc. Jpn*., 1998, **71**, 259.

3 H. Sakurai, A. Shirahata, K. Sakai and A. Hosomi, *Synthesis*, 1979, 740.

1. K.-i. Shimada, T. Morino, A. Masuda, M. Sato, M. Kitagawa and S. Saito, *J. Antibiot*., 1996, **49**, 569.
2. M. Miyoshi, Japan Patent, 29456 (1976).
3. H. Sajiki, K. Hattori and K. Hirota, *J. Org. Chem*., 1998, **63**, 7990.
4. T. Morino, K.-i. Shimada, A. Masuda, N. Yamashita, M. Nishimoto, T. Nishikiori and S. Saito, *J. Antibiot*., 1996, **49**, 564.
